# Supplementary material
Source: Springer Nature journal article supplement (https://www.springermedizin.de/resource/supplementary/12885_2008_1289_MOESM1_ESM.pdf/9471658)

**a**

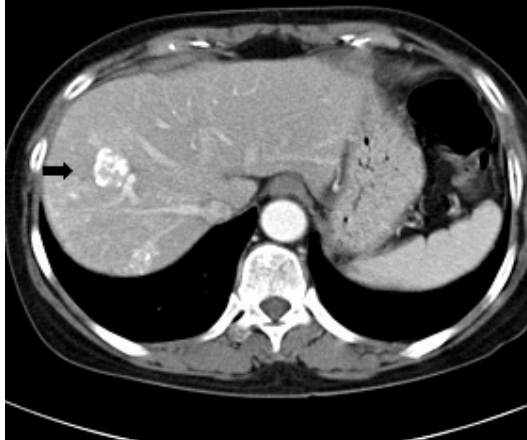

**b**

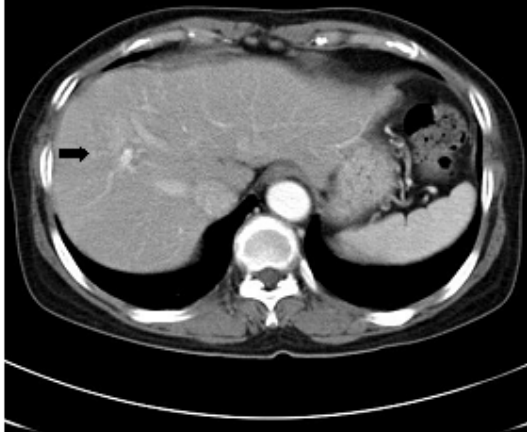

Supplement: MOESM1 [file 9471658]
